# Supplementary material for: Atmospheric deposition, CO2, and change in the land carbon sink
Source: PubMed Central journal article supplement (PMC5574890; doi:10.1038/s41598-017-08755-8), 2017-08-29
Supplement: 41598_2017_8755_MOESM1_ESM.pdf [file 41598_2017_8755_MOESM1_ESM.pdf]

# 1 **Supplementary Information**

## 2 **Atmospheric deposition, CO<sub>2</sub>, and change in the land carbon sink**

3 **Authors:** M. Fernández-Martínez<sup>\*1,2</sup>, S. Vicca<sup>3</sup>, I. A. Janssens<sup>3</sup>, P. Ciais<sup>4</sup>, M. Obersteiner<sup>5</sup>, M.  
4 Bartrons<sup>1,2</sup>, J. Sardans<sup>1,2</sup>, A. Verger<sup>1,2</sup>, J. G. Canadell<sup>6</sup>, F. Chevallier<sup>4</sup>, X. Wang<sup>7,8</sup>, C. Bernhofer<sup>9</sup>,  
5 P.S. Curtis<sup>10</sup>, D. Gianelle<sup>11,12</sup>, T. Grünwald<sup>9</sup>, B. Heinesch<sup>13</sup>, A. Ibrom<sup>14</sup>, A. Knohl<sup>15</sup>, T. Laurila<sup>16</sup>,  
6 B.E. Law<sup>17</sup>, J.M. Limousin<sup>18</sup>, B. Longdoz<sup>19</sup>, D. Loustau<sup>20</sup>, I. Mammarella<sup>21</sup>, G. Matteucci<sup>22,23</sup>,  
7 R.K. Monson<sup>24</sup>, L. Montagnani<sup>25,26</sup>, E.J. Moors<sup>27,28</sup>, J.W. Munger<sup>29</sup>, D. Papale<sup>30</sup>, S.L. Piao<sup>7,31</sup>, J.  
8 Peñuelas<sup>1,2</sup>.

### 9 **Figure captions**

10 **Fig. S1. Map indicating the locations of the 23 forest sites with eddy-covariance data.** The  
11 forests were located in temperate and boreal biomes across Europe and the USA. The boxes  
12 approximately indicate the extent of the analysis (Europe and the USA). The map was created  
13 using R software (version 3.1.1, URL <http://www.R-project.org>) and “mapdata” package  
14 (mapdata: Extra Map Databases, version 2.2), using free vector map data from Natural Earth  
15 (URL <http://www.naturalearthdata.com>).

16 **Fig. S2. Plots showing the relationships between the individual trends in C fluxes and the**  
17 **trend of S deposition in the 23 studied forests.**

18 **Table S1. Rates of change in predictors per site.** Individual Trends were computed using the  
19 robust Theil-Sen slope estimator. *P* indicates a two-tailed *P* (H1: trend ≠0). Units are ppm for  
20 CO<sub>2</sub>, kg ha<sup>-1</sup> yr<sup>-1</sup> for average N (nitrogen) and S (sulphur) deposition, kg ha<sup>-1</sup> yr<sup>-2</sup> for N and S  
21 deposition trends and, K yr<sup>-1</sup> for temperature and standard deviation yr<sup>-1</sup> for SPEI. Abbreviations:  
22 TS, Theil-Sen; for CO<sub>2</sub> source, ML indicates Mauna Loa and EC eddy covariance tower.

24 **Table S2. Average rates of change in predictors for 1995–2011.** Trends were calculated using  
25 GLMMs with random slopes, with the forest as a random effect and year as a fixed effect. Models  
26 also used an ARMA (1,0) autocorrelation structure. See Methods further details. Trend units are  
27 ppm yr<sup>-1</sup> for CO<sub>2</sub>, kg ha<sup>-1</sup> yr<sup>-2</sup> for N and S deposition, K yr<sup>-1</sup> for temperature and standard  
28 deviation yr<sup>-1</sup> for SPEI.

29

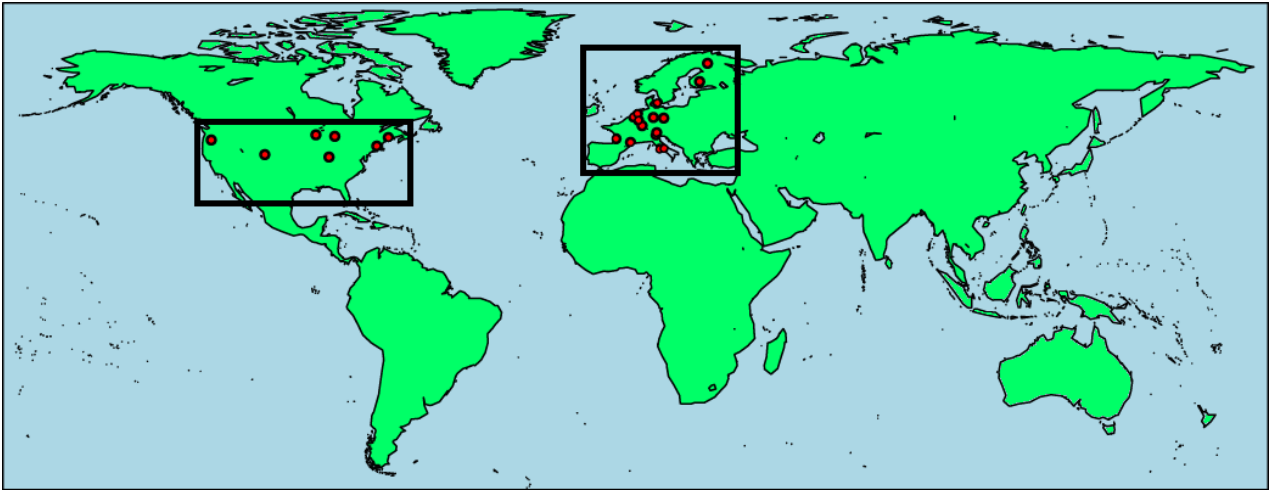

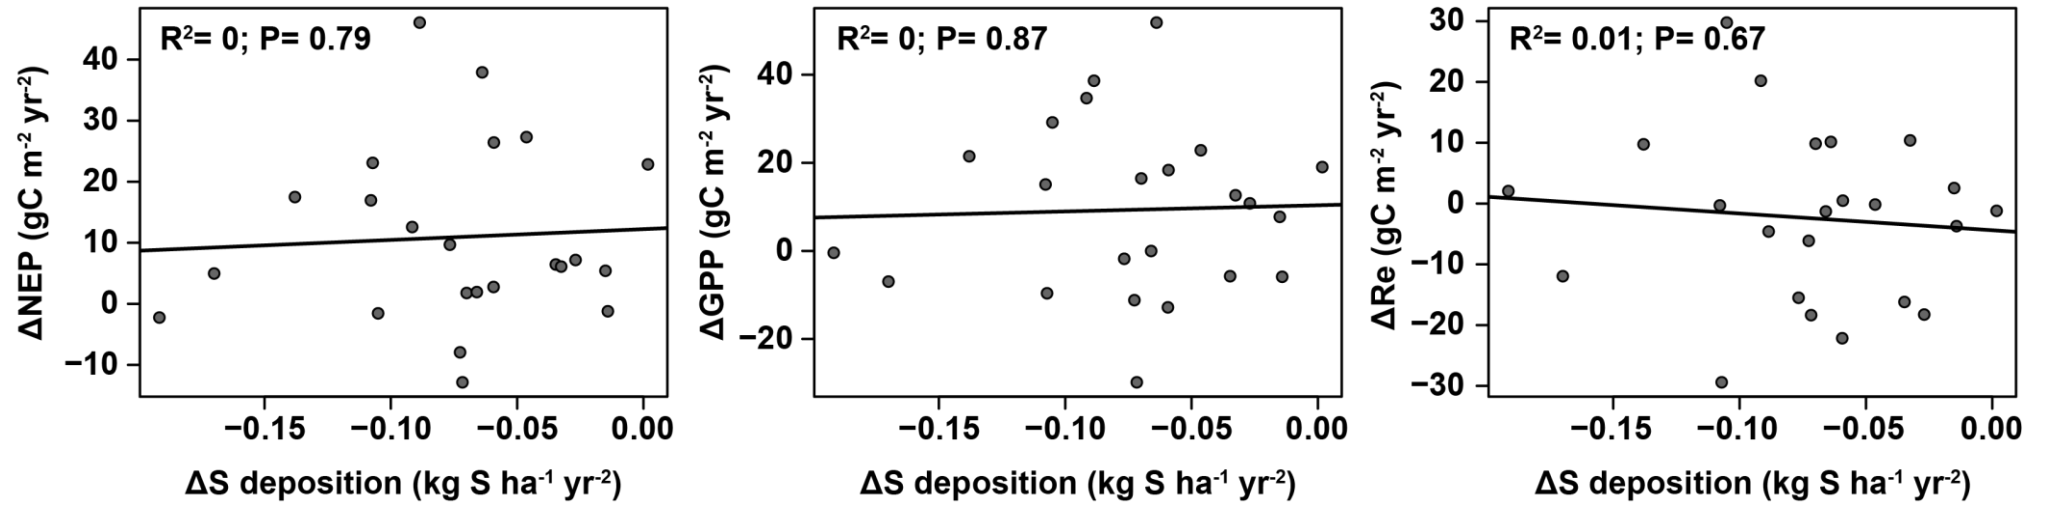

| Forest         | Source CO <sub>2</sub> | ΔCO <sub>2</sub> | N            | S           | N<br>TS Trend | P      | S<br>TS Trend | P      | MAT<br>TS Trend | P      |
|----------------|------------------------|------------------|--------------|-------------|---------------|--------|---------------|--------|-----------------|--------|
| Brasschaat     | ML                     | 27.9             | 11.64 ± 0.39 | 2.29 ± 0.18 | -0.23 ± 0.07  | 0.0215 | -0.14 ± 0.02  | 0.0002 | 0.02 ± 0.02     | 0.3513 |
| Castelporziano | EC                     | 18.9             | 6.33 ± 0.57  | 1.28 ± 0.15 | 0.06 ± 0.19   | 0.8580 | -0.06 ± 0.05  | 0.5915 | 0.00 ± 0.02     | 1.0000 |
| Collelongo     | ML                     | 30.1             | 5.66 ± 0.20  | 1.14 ± 0.12 | -0.04 ± 0.04  | 0.3502 | -0.07 ± 0.01  | 0.0018 | 0.01 ± 0.02     | 0.2758 |
| Hainich        | EC                     | 31.7             | 8.72 ± 0.38  | 1.15 ± 0.09 | -0.24 ± 0.10  | 0.1148 | -0.07 ± 0.01  | 0.0032 | -0.01 ± 0.04    | 0.9453 |
| Harvard        | EC                     | 36.3             | 6.23 ± 1.17  | 4.18 ± 0.32 | -0.21 ± 0.04  | 0.0000 | -0.09 ± 0.04  | 0.0644 | 0.06 ± 0.03     | 0.0104 |
| Hesse          | EC                     | 35.2             | 8.76 ± 0.24  | 1.38 ± 0.08 | 0.07 ± 0.06   | 0.4285 | -0.06 ± 0.01  | 0.0008 | 0.03 ± 0.02     | 0.4285 |
| Howland MT     | EC                     | 22.6             | 3.00 ± 0.11  | 3.16 ± 0.12 | -0.04 ± 0.02  | 0.1606 | -0.03 ± 0.03  | 0.5022 | -0.02 ± 0.06    | 0.8548 |
| Howland F      | EC                     | 14.4             | 20.83 ± 0.13 | 2.91 ± 0.16 | -0.04 ± 0.05  | 0.5334 | -0.02 ± 0.06  | 1.0000 | -0.03 ± 0.08    | 0.6404 |
| Hyytiala       | EC                     | 37.4             | 2.83 ± 0.08  | 0.66 ± 0.05 | -0.01 ± 0.02  | 0.8431 | -0.03 ± 0.01  | 0.0003 | 0.05 ± 0.04     | 0.2350 |
| Lavarone       | EC                     | 47.2             | 16.89 ± 0.32 | 1.14 ± 0.09 | -0.14 ± 0.13  | 0.1753 | -0.09 ± 0.01  | 0.0012 | -0.05 ± 0.07    | 0.4655 |
| Le Bray        | EC                     | 13.2             | 4.90 ± 0.37  | 1.16 ± 0.08 | 0.17 ± 0.10   | 0.1611 | -0.03 ± 0.03  | 0.5334 | -0.04 ± 0.04    | 0.1844 |
| Loobos         | EC                     | 32.7             | 13.26 ± 0.51 | 1.80 ± 0.13 | -0.33 ± 0.07  | 0.0041 | -0.11 ± 0.02  | 0.0001 | 0.03 ± 0.02     | 0.4884 |
| Metolius       | EC                     | 28.1             | 0.48 ± 0.02  | 0.38 ± 0.02 | -0.01 ± 0.01  | 0.5915 | 0.00 ± 0.01   | 0.8580 | -0.15 ± 0.04    | 0.0200 |
| Morgan Monroe  | EC                     | 25.1             | 6.57 ± 0.29  | 6.03 ± 0.33 | -0.05 ± 0.09  | 0.5830 | -0.19 ± 0.06  | 0.0124 | 0.04 ± 0.04     | 0.2215 |
| Niwot ridge    | ML                     | 21.5             | 3.46 ± 0.28  | 1.25 ± 0.10 | -0.16 ± 0.07  | 0.0467 | -0.07 ± 0.02  | 0.0075 | -0.06 ± 0.03    | 0.0467 |
| Park Falls     | EC                     | 31.2             | 4.48 ± 0.32  | 2.17 ± 0.16 | -0.09 ± 0.05  | 0.1889 | -0.08 ± 0.02  | 0.0160 | -0.01 ± 0.05    | 0.9128 |
| Puechabon      | ML                     | 25.4             | 6.18 ± 0.30  | 1.20 ± 0.10 | -0.17 ± 0.07  | 0.2758 | -0.07 ± 0.02  | 0.0617 | 0.02 ± 0.05     | 0.9378 |
| Renon          | EC                     | 33.8             | 10.18 ± 0.25 | 0.83 ± 0.09 | -0.10 ± 0.06  | 0.0769 | -0.06 ± 0.01  | 0.0000 | -0.03 ± 0.04    | 0.4277 |
| Sodankyla      | EC                     | 28.8             | 1.12 ± 0.05  | 0.26 ± 0.02 | 0.00 ± 0.01   | 0.9453 | -0.01 ± 0.00  | 0.0020 | 0.04 ± 0.07     | 0.6800 |
| Soroe          | EC                     | 38.7             | 7.72 ± 0.24  | 1.25 ± 0.07 | -0.02 ± 0.05  | 0.6693 | -0.05 ± 0.01  | 0.0019 | 0.05 ± 0.03     | 0.0995 |
| Tharandt       | EC                     | 27.2             | 9.72 ± 0.32  | 1.65 ± 0.15 | -0.18 ± 0.06  | 0.0294 | -0.11 ± 0.02  | 0.0001 | 0.04 ± 0.03     | 0.2763 |
| UMBS           | EC                     | 26.7             | 4.79 ± 0.19  | 3.05 ± 0.20 | -0.12 ± 0.04  | 0.0240 | -0.17 ± 0.02  | 0.0012 | 0.02 ± 0.05     | 0.9514 |
| Vielsalm       | ML                     | 23               | 10.07 ± 0.38 | 1.75 ± 0.13 | -0.27 ± 0.07  | 0.0124 | -0.11 ± 0.01  | 0.0001 | 0.03 ± 0.03     | 0.0995 |

|                       |             |           | <b>Total change</b> |           |          |
|-----------------------|-------------|-----------|---------------------|-----------|----------|
|                       | <b>Mean</b> | <b>SE</b> | <b>1995–2011</b>    | <b>SE</b> | <b>P</b> |
| <b>CO<sub>2</sub></b> | 2.043       | 0.139     | 34.731              | 2.370     | <0.001   |
| <b>Nitrogen</b>       | -0.087      | 0.017     | -1.478              | 0.294     | <0.001   |
| <b>Sulphur</b>        | -0.086      | 0.008     | -1.464              | 0.138     | <0.001   |
| <b>Temperature</b>    | 0.003       | 0.008     | 0.047               | 0.136     | 0.73     |
| <b>SPEI</b>           | -0.001      | 0.005     | -0.011              | 0.091     | 0.91     |

37

38

39

40

42 **Summary of models and statistical analyses**

43 **1. Spatial variability of trends in C fluxes: relationships between annual trends**  
 44 **in carbon fluxes and predictors**

45 Models were adjusted using stepwise forward models using the following saturated model: C flux  
 46 trend ~ MATc + MAPc + N dep + S dep + Age + corrected maturity age + leaf type + (ph +  
 47 n.wet.t + s.wet.t)^2 + n.wet.t + deltacdioxide + MAT.t + SPEI.t + lai.max.t + Total Biomass,  
 48 where ^2 indicates a first-order interaction of the variables within the brackets. Models were  
 49 weighted for the n years of the plots. “.t” suffixes in variables indicate the trends of the variable.  
 50 Significance levels: (\*),  $P < 0.1$ ; \*,  $P < 0.05$ ; \*\*,  $P < 0.01$ ; \*\*\*,  $P < 0.001$ .

**GPP**

|                      | <b>Estimate</b>           | <b>SE</b> | <b>Beta</b>                   | <b>SE</b> | <b>t</b> | <b>Pr(&gt; t )</b> |     | <b>PMVD</b> |
|----------------------|---------------------------|-----------|-------------------------------|-----------|----------|--------------------|-----|-------------|
| <b>(Intercept)</b>   | -77.6300                  | 15.5900   | 0.0000                        | 0.0000    | -4.979   | 0.000252           | *** |             |
| <b>deltacdioxide</b> | 2.1190                    | 0.4382    | 0.7630                        | 0.1578    | 4.836    | 0.000325           | *** | 0.40        |
| <b>Total Biomass</b> | 0.0027                    | 0.0006    | 0.6834                        | 0.1600    | 4.271    | 0.000912           | *** | 0.31        |
|                      | <b>R<sup>2</sup></b> 0.71 |           | <b>R<sup>2</sup> adj</b> 0.66 |           |          |                    |     |             |

**Re**

|                           | <b>Estimate</b>           | <b>SE</b> | <b>Beta</b>                   | <b>SE</b> | <b>t</b> | <b>Pr(&gt; t )</b> |     | <b>PMVD</b> |
|---------------------------|---------------------------|-----------|-------------------------------|-----------|----------|--------------------|-----|-------------|
| <b>(Intercept)</b>        | -11.1942                  | 11.1889   | 0.0000                        | 0.0000    | -1.000   | 0.336826           |     |             |
| <b>Total Biomass</b>      | 0.0041                    | 0.0009    | 1.1697                        | 0.2511    | 4.658    | 0.000553           | *** | 0.37        |
| <b>MAT.t</b>              | 228.3477                  | 63.5489   | 0.7543                        | 0.2099    | 3.593    | 0.003691           | **  | 0.20        |
| <b>Corrected Mat. Age</b> | -38.7487                  | 15.8033   | -0.5851                       | 0.2386    | -2.452   | 0.030485           | *   | 0.11        |
|                           | <b>R<sup>2</sup></b> 0.68 |           | <b>R<sup>2</sup> adj</b> 0.60 |           |          |                    |     |             |

**NEP**

|                      | <b>Estimate</b>           | <b>SE</b> | <b>Beta</b>                   | <b>SE</b> | <b>t</b> | <b>Pr(&gt; t )</b> |     | <b>PMVD</b> |
|----------------------|---------------------------|-----------|-------------------------------|-----------|----------|--------------------|-----|-------------|
| <b>(Intercept)</b>   | -36.1746                  | 7.3628    | 0.0000                        | 0.0000    | -4.913   | 9.65E-05           | *** |             |
| <b>deltacdioxide</b> | 1.4555                    | 0.2473    | 0.7462                        | 0.1268    | 5.885    | 1.15E-05           | *** | 0.43        |
| <b>N dep</b>         | 1.1745                    | 0.3706    | 0.3943                        | 0.1244    | 3.169    | 0.00505            | **  | 0.14        |
| <b>MAT.t</b>         | -135.7225                 | 39.6104   | -0.4430                       | 0.1293    | -3.426   | 0.00283            | **  | 0.14        |
|                      | <b>R<sup>2</sup></b> 0.71 |           | <b>R<sup>2</sup> adj</b> 0.66 |           |          |                    |     |             |

51

52

**LAI max**

|                      | <b>Estimate</b> | <b>SE</b> | <b>Beta</b>              | <b>SE</b> | <b>t</b> | <b>Pr(&gt; t )</b> | <b>PMVD</b> |
|----------------------|-----------------|-----------|--------------------------|-----------|----------|--------------------|-------------|
| <b>(Intercept)</b>   | -0.1257         | 0.0427    | 0.0000                   | 0.0000    | -2.941   | 0.00807            |             |
| <b>pH</b>            | 0.0293          | 0.0084    | 0.5295                   | 0.1520    | 3.483    | 0.00235            | 0.38        |
| <b>MAT.t</b>         | -0.3992         | 0.1849    | -0.3345                  | 0.1549    | -2.159   | 0.04315            | 0.15        |
| <b>R<sup>2</sup></b> | 0.53            |           | <b>R<sup>2</sup> adj</b> | 0.48      |          |                    |             |

53

54



55 **2. Models to assess temporal contributions: relationships between C fluxes and**  
56 **predictor annual values using model averaging of generalized mixed models**  
57 **(only models with  $\Delta AICc < 4$ ).**

## 58 **2.1 – Model averaging using inteannual data from the 23 forests**

59 **Saturated models' formulation:** Response variable  $\sim$  maximum lai anomalies + (mean S  
60 deposition + S anomalies +  $CO_2$ )<sup>2</sup> + (mean N deposition + N anomalies +  $CO_2$ )<sup>2</sup> + (MATc +  
61 MAT anomalies +  $CO_2$ )<sup>2</sup> + (MAPc + SPEI +  $CO_2$ )<sup>2</sup> + mean S deposition \* mean N deposition  
62 + MATc \* MAPc + age \*  $CO_2$ , where ^2 indicates a first-order interaction of the variables within  
63 the brackets. SE, standard error; Rel. Imp, relative importance of the predictors. Significance  
64 levels: (\*),  $P < 0.1$ ; \*,  $P < 0.05$ ; \*\*,  $P < 0.01$ ; \*\*\*,  $P < 0.001$ .

### 65 **List of acronyms**

66 **age:** Stand age

67 **cdioxide.an:**  $CO_2$  concentration anomalies

68 **lai.max.an:** Maximum LAI anomalies

69 **ndep:** Mean N deposition

70 **sdep:** Mean S deposition

71 **n.wet.an:** N deposition anomalies

72 **s.wet.an:** S deposition anomalies

73 **mat:** climatic mean annual temperature

74 **map:** climatic mean annual precipitation

75 **tmean.an:** mean annual temperature anomalies

76 **spei:** Standardized Precipitation Evapotranspiration Index

77

78 **2.1.1 Average model for NEP (for years 1995 - 2011)**

| <b>Variable</b>             | <b>Estimate</b> | <b>SE</b> | <b>Adj. SE</b> | <b>Rel. Imp</b> | <b>z value</b> | <b>Pr(&gt; z )</b> |     |
|-----------------------------|-----------------|-----------|----------------|-----------------|----------------|--------------------|-----|
| <b>(Intercept)</b>          | 11.420          | 24.240    | 24.350         |                 | 0.47           | 0.6391             |     |
| <b>age</b>                  | -0.074          | 0.179     | 0.191          | 1.00            | 0.39           | 0.6973             |     |
| <b>cdioxide.an</b>          | 6.825           | 2.290     | 2.300          | 1.00            | 2.97           | 0.0030             | **  |
| <b>lai.max.an</b>           | -1.413          | 6.981     | 7.006          | 0.14            | 0.20           | 0.8401             |     |
| <b>n.wet.an</b>             | -7.667          | 14.370    | 14.390         | 0.39            | 0.53           | 0.5943             |     |
| <b>ndep</b>                 | 0.018           | 1.876     | 1.999          | 0.97            | 0.01           | 0.9929             |     |
| <b>s.wet.an</b>             | 20.320          | 19.860    | 19.920         | 0.99            | 1.02           | 0.3078             |     |
| <b>sdep</b>                 | 0.718           | 3.030     | 3.191          | 0.20            | 0.23           | 0.8219             |     |
| <b>map</b>                  | 0.002           | 0.017     | 0.018          | 0.11            | 0.11           | 0.9157             |     |
| <b>spei</b>                 | -1.396          | 7.512     | 7.540          | 0.15            | 0.19           | 0.8531             |     |
| <b>mat</b>                  | 0.067           | 0.769     | 0.818          | 0.11            | 0.08           | 0.9350             |     |
| <b>tmean.an</b>             | -13.340         | 11.190    | 11.220         | 0.77            | 1.19           | 0.2344             |     |
| <b>age:cdioxide.an</b>      | -0.064          | 0.019     | 0.019          | 1.00            | 3.29           | 0.0010             | *** |
| <b>cdioxide.an:map</b>      | 0.000           | 0.001     | 0.001          | 0.01            | 0.05           | 0.9620             |     |
| <b>cdioxide.an:mat</b>      | -0.002          | 0.034     | 0.034          | 0.01            | 0.06           | 0.9561             |     |
| <b>cdioxide.an:n.wet.an</b> | -0.015          | 0.171     | 0.171          | 0.03            | 0.09           | 0.9291             |     |
| <b>cdioxide.an:ndep</b>     | 0.536           | 0.222     | 0.223          | 0.97            | 2.40           | 0.0162             | *   |
| <b>cdioxide.an:s.wet.an</b> | 3.040           | 1.285     | 1.291          | 0.99            | 2.36           | 0.0185             | *   |
| <b>cdioxide.an:sdep</b>     | -0.007          | 0.098     | 0.098          | 0.01            | 0.07           | 0.9454             |     |
| <b>cdioxide.an:spei</b>     | 0.009           | 0.202     | 0.203          | 0.01            | 0.05           | 0.9641             |     |
| <b>cdioxide.an:tmean.an</b> | -0.025          | 0.302     | 0.304          | 0.08            | 0.08           | 0.9335             |     |
| <b>ndep:n.wet.an</b>        | 0.533           | 1.273     | 1.275          | 0.21            | 0.42           | 0.6760             |     |
| <b>ndep:sdep</b>            | 0.002           | 0.160     | 0.172          | 0.01            | 0.01           | 0.9888             |     |
| <b>sdep:s.wet.an</b>        | 0.253           | 1.947     | 1.951          | 0.03            | 0.13           | 0.8970             |     |

57 with models  $\Delta AICc < 4$

79

80

81

82 **2.1.2 Average model for GPP (for years 1995 - 2011)**

| Variable                    | Estimate | SE     | Adj. SE | Rel.Imp | <b>z</b><br>value | Pr(> z ) |   |
|-----------------------------|----------|--------|---------|---------|-------------------|----------|---|
| <b>(Intercept)</b>          | -9.272   | 27.020 | 27.140  |         | 0.342             | 0.7326   |   |
| <b>age</b>                  | -0.001   | 0.074  | 0.079   | 0.09    | 0.02              | 0.9869   |   |
| <b>cdioxide.an</b>          | 5.120    | 2.138  | 2.144   | 1.00    | 2.39              | 0.0169   | * |
| <b>lai.max.an</b>           | 0.619    | 7.112  | 7.142   | 0.08    | 0.09              | 0.9309   |   |
| <b>n.wet.an</b>             | 9.598    | 11.720 | 11.760  | 0.71    | 0.82              | 0.4142   |   |
| <b>ndep</b>                 | -0.072   | 0.869  | 0.919   | 0.12    | 0.08              | 0.9374   |   |
| <b>s.wet.an</b>             | -34.990  | 27.690 | 27.780  | 0.92    | 1.26              | 0.2079   |   |
| <b>sdep</b>                 | -0.007   | 2.101  | 2.224   | 0.08    | 0.00              | 0.9973   |   |
| <b>map</b>                  | 0.001    | 0.021  | 0.022   | 0.10    | 0.03              | 0.9740   |   |
| <b>spei</b>                 | 16.000   | 31.420 | 31.480  | 0.42    | 0.51              | 0.6113   |   |
| <b>mat</b>                  | 0.574    | 1.901  | 1.989   | 0.28    | 0.29              | 0.7728   |   |
| <b>tmean.an</b>             | 15.790   | 18.100 | 18.140  | 0.73    | 0.87              | 0.3841   |   |
| <b>age:cdioxide.an</b>      | 0.000    | 0.004  | 0.004   | 0.01    | 0.08              | 0.9350   |   |
| <b>cdioxide.an:map</b>      | 0.000    | 0.001  | 0.001   | 0.01    | 0.04              | 0.9663   |   |
| <b>cdioxide.an:mat</b>      | -0.063   | 0.223  | 0.224   | 0.11    | 0.28              | 0.7791   |   |
| <b>cdioxide.an:n.wet.an</b> | -0.677   | 1.092  | 1.093   | 0.37    | 0.62              | 0.5360   |   |
| <b>cdioxide.an:ndep</b>     | 0.014    | 0.089  | 0.089   | 0.04    | 0.15              | 0.8792   |   |
| <b>cdioxide.an:s.wet.an</b> | -2.775   | 2.448  | 2.453   | 0.70    | 1.13              | 0.2578   |   |
| <b>cdioxide.an:sdep</b>     | 0.002    | 0.060  | 0.061   | 0.00    | 0.03              | 0.9737   |   |
| <b>cdioxide.an:spei</b>     | -0.037   | 0.516  | 0.518   | 0.03    | 0.07              | 0.9430   |   |
| <b>cdioxide.an:tmean.an</b> | 0.339    | 0.941  | 0.943   | 0.21    | 0.36              | 0.7193   |   |
| <b>map:spei</b>             | -0.002   | 0.022  | 0.022   | 0.01    | 0.08              | 0.9338   |   |
| <b>mat:tmean.an</b>         | 0.274    | 1.527  | 1.530   | 0.05    | 0.18              | 0.8579   |   |

233 models with  $\Delta AICc < 4$

83

84

85 **2.1.3 Average model for Re (for years 1995 - 2011)**

| Variable             | Estimate | SE     | Adj. SE | Rel.Imp | z value | Pr(> z ) |     |
|----------------------|----------|--------|---------|---------|---------|----------|-----|
| (Intercept)          | -18.530  | 27.210 | 27.330  |         | 0.678   | 0.4977   |     |
| age                  | 0.003    | 0.071  | 0.075   | 0.088   | 0.04    | 0.9721   |     |
| cdioxide.an          | 0.507    | 2.912  | 2.920   | 1.000   | 0.17    | 0.8622   |     |
| lai.max.an           | 8.362    | 17.610 | 17.650  | 0.314   | 0.47    | 0.6356   |     |
| ndep                 | -0.023   | 0.642  | 0.682   | 0.071   | 0.03    | 0.9729   |     |
| n.wet.an             | 19.640   | 12.050 | 12.090  | 0.896   | 1.62    | 0.1043   |     |
| sdep                 | -0.363   | 3.764  | 3.987   | 0.268   | 0.09    | 0.9275   |     |
| s.wet.an             | -65.780  | 26.510 | 26.620  | 1.000   | 2.47    | 0.0135   | *   |
| mat                  | 0.695    | 2.328  | 2.461   | 0.550   | 0.28    | 0.7778   |     |
| tmean.an             | 32.250   | 22.350 | 22.410  | 1.000   | 1.44    | 0.1502   |     |
| map                  | -0.001   | 0.019  | 0.020   | 0.081   | 0.04    | 0.9709   |     |
| spei                 | 26.350   | 28.090 | 28.150  | 0.642   | 0.94    | 0.3492   |     |
| age:cdioxide.an      | 0.000    | 0.004  | 0.004   | 0.014   | 0.08    | 0.9332   |     |
| cdioxide.an:n.wet.an | -0.014   | 0.290  | 0.291   | 0.068   | 0.05    | 0.9628   |     |
| cdioxide.an:sdep     | 0.309    | 0.772  | 0.773   | 0.181   | 0.40    | 0.6889   |     |
| cdioxide.an:s.wet.an | -6.568   | 1.760  | 1.768   | 1.000   | 3.72    | 0.0002   | *** |
| cdioxide.an:mat      | -0.321   | 0.463  | 0.464   | 0.422   | 0.69    | 0.4883   |     |
| cdioxide.an:tmean.an | 1.172    | 1.466  | 1.469   | 0.547   | 0.80    | 0.4251   |     |
| cdioxide.an:map      | 0.000    | 0.001  | 0.001   | 0.003   | 0.04    | 0.9718   |     |
| cdioxide.an:spei     | -0.068   | 0.665  | 0.668   | 0.061   | 0.10    | 0.9184   |     |
| sdep:s.wet.an        | 0.025    | 1.195  | 1.200   | 0.010   | 0.02    | 0.9835   |     |
| mat:tmean.an         | 1.214    | 2.966  | 2.971   | 0.219   | 0.41    | 0.6828   |     |

181 models with  $\Delta AICc < 4$

86

87

88 **2.1.4 Average model for LAI (for years 1995 - 2011)**

89

| Variable                    | Estimate | SE    | Adj. SE | Rel.Imp | z value | Pr(> z ) |
|-----------------------------|----------|-------|---------|---------|---------|----------|
| <b>(Intercept)</b>          | 0.030    | 0.096 | 0.096   |         | 0.31    | 0.754    |
| <b>age</b>                  | 0.000    | 0.000 | 0.000   | 0.36    | 0.18    | 0.854    |
| <b>cdioxide.an</b>          | 0.018    | 0.015 | 0.015   | 1.00    | 1.22    | 0.223    |
| <b>map</b>                  | 0.000    | 0.000 | 0.000   | 0.23    | 0.19    | 0.848    |
| <b>spei</b>                 | 0.002    | 0.039 | 0.039   | 0.09    | 0.06    | 0.952    |
| <b>mat</b>                  | 0.000    | 0.007 | 0.007   | 0.74    | 0.01    | 0.992    |
| <b>tmean.an</b>             | -0.038   | 0.045 | 0.045   | 0.77    | 0.84    | 0.402    |
| <b>ndep</b>                 | 0.000    | 0.002 | 0.002   | 0.09    | 0.02    | 0.981    |
| <b>n.wet.an</b>             | 0.001    | 0.009 | 0.009   | 0.11    | 0.07    | 0.945    |
| <b>sdep</b>                 | -0.012   | 0.018 | 0.019   | 0.89    | 0.63    | 0.528    |
| <b>s.wet.an</b>             | -0.098   | 0.093 | 0.094   | 0.98    | 1.04    | 0.298    |
| <b>age:cdioxide.an</b>      | 0.000    | 0.000 | 0.000   | 0.31    | 0.58    | 0.565    |
| <b>cdioxide.an:map</b>      | 0.000    | 0.000 | 0.000   | 0.14    | 0.36    | 0.721    |
| <b>cdioxide.an:mat</b>      | 0.002    | 0.001 | 0.001   | 0.73    | 1.26    | 0.209    |
| <b>cdioxide.an:tmean.an</b> | -0.004   | 0.004 | 0.004   | 0.59    | 0.92    | 0.360    |
| <b>cdioxide.an:sdep</b>     | -0.007   | 0.004 | 0.004   | 0.89    | 1.89    | 0.059    |
| <b>cdioxide.an:s.wet.an</b> | -0.011   | 0.005 | 0.005   | 0.96    | 2.10    | 0.036    |
| <b>s.wet.an:sdep</b>        | 0.004    | 0.015 | 0.015   | 0.18    | 0.27    | 0.787    |
| <b>map:spei</b>             | 0.000    | 0.000 | 0.000   | 0.01    | 0.06    | 0.953    |
| <b>mat:tmean.an</b>         | 0.001    | 0.004 | 0.004   | 0.10    | 0.19    | 0.852    |

**103 models with  $\Delta AICc < 4$**

90

91 **2.2. Results from the saturated (i.e., full) models (model summaries and**  
 92 **temporal contributions) using temperature and SPEI for the warm half of the**  
 93 **year (April – September) for the 23 forests.**

94 **NEP**

|                                 | <b>Value</b> | <b>Std.Error</b> | <b>DF</b>   | <b>t-value</b> | <b>p-value</b> |
|---------------------------------|--------------|------------------|-------------|----------------|----------------|
| <b>(Intercept)</b>              | 25.26972     | 92.60895         | 250         | 0.272865       | 0.7852         |
| <b>lai.max.an</b>               | -13.9428     | 17.10382         | 250         | -0.81519       | 0.4157         |
| <b>age</b>                      | -0.08846     | 0.20282          | 14          | -0.43614       | 0.6694         |
| <b>cdioxide.an</b>              | 7.843715     | 5.1522           | 250         | 1.5224         | 0.1292         |
| <b>sdep</b>                     | -3.33984     | 33.42586         | 14          | -0.09992       | 0.9218         |
| <b>s.wet.an</b>                 | 10.18673     | 53.0002          | 250         | 0.192202       | 0.8477         |
| <b>ndep</b>                     | -0.14425     | 6.85113          | 14          | -0.02106       | 0.9835         |
| <b>n.wet.an</b>                 | -26.7314     | 18.71101         | 250         | -1.42864       | 0.1544         |
| <b>mat</b>                      | 1.342473     | 14.50814         | 14          | 0.092532       | 0.9276         |
| <b>temp.warm.an</b>             | -9.8591      | 19.28865         | 250         | -0.51113       | 0.6097         |
| <b>map</b>                      | -0.02279     | 0.1408           | 14          | -0.16182       | 0.8738         |
| <b>spei.hot</b>                 | 21.19634     | 66.55602         | 250         | 0.318474       | 0.7504         |
| <b>age:cdioxide.an</b>          | -0.05766     | 0.02085          | 250         | -2.76498       | 0.0061         |
| <b>sdep:s.wet.an</b>            | 2.568747     | 9.23095          | 250         | 0.278276       | 0.781          |
| <b>cdioxide.an:sdep</b>         | -0.62546     | 0.949            | 250         | -0.65907       | 0.5105         |
| <b>cdioxide.an:s.wet.an</b>     | 3.690413     | 1.82765          | 250         | 2.019212       | 0.0445         |
| <b>ndep:n.wet.an</b>            | 2.103415     | 1.7637           | 250         | 1.192614       | 0.2342         |
| <b>cdioxide.an:ndep</b>         | 0.653451     | 0.23053          | 250         | 2.83462        | 0.005          |
| <b>cdioxide.an:n.wet.an</b>     | -0.81433     | 0.92146          | 250         | -0.88373       | 0.3777         |
| <b>mat:temp.warm.an</b>         | -1.72551     | 2.32907          | 250         | -0.74086       | 0.4595         |
| <b>cdioxide.an:mat</b>          | 0.049929     | 0.3242           | 250         | 0.154004       | 0.8777         |
| <b>cdioxide.an:temp.warm.an</b> | -0.48956     | 1.12629          | 250         | -0.43466       | 0.6642         |
| <b>map:spei.hot</b>             | -0.03304     | 0.07926          | 250         | -0.41688       | 0.6771         |
| <b>cdioxide.an:map</b>          | -0.00116     | 0.00674          | 250         | -0.172         | 0.8636         |
| <b>cdioxide.an:spei.hot</b>     | 1.309095     | 1.72203          | 250         | 0.760206       | 0.4478         |
| <b>sdep:ndep</b>                | 0.05407      | 1.80042          | 14          | 0.030032       | 0.9765         |
| <b>sdep:map</b>                 | 0.005158     | 0.03464          | 14          | 0.148915       | 0.8837         |
| <b>mat:map</b>                  | -0.0008      | 0.01802          | 14          | -0.04414       | 0.9654         |
| <b>Phi</b>                      | <b>Rsqm</b>  | <b>Rsqc</b>      | <b>AICc</b> | <b>BIC</b>     | <b>logLik</b>  |
| 0.2954446                       | 0.242374     | 0.242374         | 3546.102    | 3652.451       | -1738.24       |

95  
96

97 **2.2.1 – NEP Temporal contributions**

|                   | <b>mean y<sup>-1</sup></b> | <b>SE</b>    | <b><i>t</i></b> | <b><i>P</i></b> |
|-------------------|----------------------------|--------------|-----------------|-----------------|
| <b>Data trend</b> | <b>7.599</b>               | <b>2.099</b> | <b>3.62000</b>  | <b>0.00040</b>  |
| <b>cdioxide</b>   | <b>10.640</b>              | <b>1.090</b> | <b>9.75797</b>  | <b>0.00000</b>  |
| <b>n.wet.an</b>   | 0.775                      | 1.520        | 0.50941         | 0.30710         |
| <b>s.wet.an</b>   | <b>-1.985</b>              | <b>1.411</b> | <b>-1.40674</b> | <b>0.08489</b>  |
| <b>tmean.an</b>   | -1.015                     | 1.502        | -0.67621        | 0.25204         |
| <b>spei</b>       | 0.130                      | 1.500        | 0.08672         | 0.46574         |
| <b>LAI</b>        | -0.357                     | 1.489        | -0.23980        | 0.40606         |
| <b>Unknown</b>    | -0.588                     | 4.077        | -0.14418        | 0.44316         |

98

99

|                          | Value    | Std.Error | DF  | t-value  | p-value |
|--------------------------|----------|-----------|-----|----------|---------|
| (Intercept)              | 15.1771  | 124.9807  | 250 | 0.121436 | 0.9034  |
| lai.max.an               | 0.05699  | 24.90648  | 250 | 0.002288 | 0.9982  |
| age                      | -0.01349 | 0.27361   | 14  | -0.0493  | 0.9614  |
| cdioxide.an              | 11.77647 | 7.11432   | 250 | 1.655319 | 0.0991  |
| sdep                     | -7.17418 | 45.15145  | 14  | -0.15889 | 0.876   |
| s.wet.an                 | -74.7771 | 76.54979  | 250 | -0.97684 | 0.3296  |
| ndep                     | -1.43882 | 9.26116   | 14  | -0.15536 | 0.8788  |
| n.wet.an                 | 7.18204  | 27.33785  | 250 | 0.262714 | 0.793   |
| mat                      | 2.86488  | 19.61705  | 14  | 0.146041 | 0.886   |
| temp.warm.an             | 57.18129 | 28.53551  | 250 | 2.003864 | 0.0462  |
| map                      | -0.03458 | 0.19014   | 14  | -0.18187 | 0.8583  |
| spei.hot                 | 206.3117 | 97.88954  | 250 | 2.107597 | 0.0361  |
| age:cdioxide.an          | -0.05562 | 0.02882   | 250 | -1.93013 | 0.0547  |
| sdep:s.wet.an            | 6.93231  | 13.3947   | 250 | 0.517542 | 0.6052  |
| cdioxide.an:sdep         | 2.1749   | 1.32897   | 250 | 1.636533 | 0.103   |
| cdioxide.an:s.wet.an     | -3.17238 | 2.63689   | 250 | -1.20308 | 0.2301  |
| ndep:n.wet.an            | 0.90267  | 2.5985    | 250 | 0.347381 | 0.7286  |
| cdioxide.an:ndep         | 0.51316  | 0.32177   | 250 | 1.594812 | 0.112   |
| cdioxide.an:n.wet.an     | -0.94639 | 1.34532   | 250 | -0.70347 | 0.4824  |
| mat:temp.warm.an         | -6.08596 | 3.46873   | 250 | -1.75452 | 0.0806  |
| cdioxide.an:mat          | -0.87045 | 0.44943   | 250 | -1.9368  | 0.0539  |
| cdioxide.an:temp.warm.an | 0.2967   | 1.66495   | 250 | 0.178203 | 0.8587  |
| map:spei.hot             | -0.19894 | 0.11673   | 250 | -1.7042  | 0.0896  |
| cdioxide.an:map          | -0.00978 | 0.00927   | 250 | -1.05477 | 0.2925  |
| cdioxide.an:spei.hot     | -0.16655 | 2.53177   | 250 | -0.06578 | 0.9476  |
| sdep:ndep                | 0.14508  | 2.43395   | 14  | 0.059605 | 0.9533  |
| sdep:map                 | 0.00852  | 0.04681   | 14  | 0.181913 | 0.8583  |
| mat:map                  | -0.00079 | 0.02437   | 14  | -0.03223 | 0.9747  |

| Phi       | Rsqm     | Rsqc     | AICc     | BIC      | logLik   |
|-----------|----------|----------|----------|----------|----------|
| 0.2308718 | 0.220671 | 0.220671 | 3764.943 | 3871.291 | -1847.66 |

101

## 102 Temporal contributions

|            | mean y-1 | SE    | t        | P       |
|------------|----------|-------|----------|---------|
| Data trend | 10.386   | 2.854 | 3.63935  | 0.00030 |
| cdioxide   | 9.308    | 1.330 | 6.99874  | 0.00000 |
| n.wet.an   | -1.001   | 1.831 | -0.54696 | 0.29423 |
| s.wet.an   | 4.498    | 1.594 | 2.82223  | 0.00419 |
| tmean.an   | 0.675    | 1.741 | 0.38795  | 0.35040 |
| spei       | 1.790    | 2.453 | 0.72962  | 0.23564 |
| LAI        | 0.001    | 1.766 | 0.00076  | 0.49970 |
| Unknown    | -4.886   | 5.289 | -0.92377 | 0.18149 |

103



|                          | Value    | Std.Error | DF  | t-value  | p-value |
|--------------------------|----------|-----------|-----|----------|---------|
| (Intercept)              | -12.1282 | 121.3939  | 250 | -0.09991 | 0.9205  |
| lai.max.an               | 15.39452 | 23.30676  | 250 | 0.660517 | 0.5095  |
| age                      | 0.07416  | 0.26581   | 14  | 0.279013 | 0.7843  |
| cdioxide.an              | 4.39585  | 6.83368   | 250 | 0.643262 | 0.5206  |
| sdep                     | -2.5121  | 43.83465  | 14  | -0.05731 | 0.9551  |
| s.wet.an                 | -85.2725 | 71.92902  | 250 | -1.18551 | 0.2369  |
| ndep                     | -1.70817 | 8.98793   | 14  | -0.19005 | 0.852   |
| n.wet.an                 | 34.17782 | 25.53889  | 250 | 1.338266 | 0.182   |
| mat                      | 0.87198  | 19.0355   | 14  | 0.045808 | 0.9641  |
| temp.warm.an             | 66.02805 | 26.4901   | 250 | 2.492555 | 0.0133  |
| map                      | -0.00787 | 0.18462   | 14  | -0.04262 | 0.9666  |
| spei.hot                 | 181.3342 | 91.1403   | 250 | 1.989616 | 0.0477  |
| age:cdioxide.an          | -0.0013  | 0.02767   | 250 | -0.04704 | 0.9625  |
| sdep:s.wet.an            | 4.50885  | 12.55709  | 250 | 0.359068 | 0.7198  |
| cdioxide.an:sdep         | 2.87246  | 1.26747   | 250 | 2.266287 | 0.0243  |
| cdioxide.an:s.wet.an     | -7.00665 | 2.4785    | 250 | -2.82697 | 0.0051  |
| ndep:n.wet.an            | -1.30446 | 2.41737   | 250 | -0.53962 | 0.5899  |
| cdioxide.an:ndep         | -0.16081 | 0.30741   | 250 | -0.52312 | 0.6014  |
| cdioxide.an:n.wet.an     | 0.07522  | 1.25717   | 250 | 0.059829 | 0.9523  |
| mat:temp.warm.an         | -4.09729 | 3.20912   | 250 | -1.27676 | 0.2029  |
| cdioxide.an:mat          | -0.90676 | 0.43085   | 250 | -2.10459 | 0.0363  |
| cdioxide.an:temp.warm.an | 1.00636  | 1.54592   | 250 | 0.650974 | 0.5157  |
| map:spei.hot             | -0.1599  | 0.10861   | 250 | -1.4722  | 0.1422  |
| cdioxide.an:map          | -0.00913 | 0.00892   | 250 | -1.02256 | 0.3075  |
| cdioxide.an:spei.hot     | -1.67028 | 2.35747   | 250 | -0.70851 | 0.4793  |
| sdep:ndep                | 0.20576  | 2.36206   | 14  | 0.087112 | 0.9318  |
| sdep:map                 | 0.00105  | 0.04544   | 14  | 0.023075 | 0.9819  |
| mat:map                  | 0.00088  | 0.02365   | 14  | 0.037319 | 0.9708  |

| Phi      | Rsqm     | Rsqc     | AICc    | BIC      | logLik   |
|----------|----------|----------|---------|----------|----------|
| 0.263431 | 0.202652 | 0.202652 | 3726.29 | 3832.639 | -1828.33 |

105

## 106 Temporal contributions

|            | mean y-1     | SE           | t              | P               |
|------------|--------------|--------------|----------------|-----------------|
| Data trend | 2.792        | 2.818        | 0.99108        | 0.32250         |
| cdioxide   | -1.733       | 1.542        | -1.12366       | 0.135034        |
| n.wet.an   | -1.561       | 2.087        | -0.74765       | 0.230246        |
| s.wet.an   | <b>6.464</b> | <b>1.634</b> | <b>3.95578</b> | <b>0.000216</b> |
| tmean.an   | 1.585        | 1.937        | 0.81845        | 0.209777        |
| spei       | 0.441        | 1.990        | 0.22161        | 0.41306         |
| LAI        | 0.333        | 1.980        | 0.16795        | 0.433875        |
| Unknown    | -2.737       | 5.383        | -0.50838       | 0.30745         |

107 **Additional references (for Table 1)**

- 108 1. de Pury DGG, Ceulemans R (1997) Scaling-up carbon fluxes from leaves to stands in a patchy  
109 coniferous/deciduous forest. In: Mohren GMJ (ed) Impacts of global change on tree and forest  
110 ecosystems. Kluwer Academic, Dordrecht, pp 263–272
- 111 2. Reichstein, M. *et al.* Ecosystem respiration in two Mediterranean evergreen Holm Oak forests:  
112 drought effects and decomposition dynamics. *Funct. Ecol.* **16**, 27–39 (2002).
- 113 3. Valentini, R. *et al.* Seasonal net carbon dioxide exchange of a beech forest with the atmosphere.  
114 *Glob. Chang. Biol.* **2**, 199–207 (1996).
- 115 4. Knohl, A., Schulze, E.-D., Kolle, O. & Buchmann, N. Large carbon uptake by an unmanaged  
116 250-year-old deciduous forest in Central Germany. *Agric. For. Meteorol.* **118**, 151–167 (2003).
- 117 5. Urbanski, S. *et al.* Factors controlling CO<sub>2</sub> exchange on timescales from hourly to decadal at  
118 Harvard Forest. *J. Geophys. Res.* **112**, G02020 (2007).
- 119 6. Genet, H., Bréda, N. & Dufrêne, E. Age-related variation in carbon allocation at tree and stand  
120 scales in beech (*Fagus sylvatica* L.) and sessile oak (*Quercus petraea* (Matt.) Liebl.) using a  
121 chronosequence approach. *Tree Physiol.* **30**, 177–92 (2010).
- 122 7. Zhang, J., Wu, L., Huang, G. & Notaro, M. Relationships between large-scale circulation  
123 patterns and carbon dioxide exchange by a deciduous forest. *J. Geophys. Res.* **116**, D04102  
124 (2011).
- 125 8. Kowalski, A. S. *et al.* Paired comparisons of carbon exchange between undisturbed and  
126 regenerating stands in four managed forests in Europe. *Glob. Chang. Biol.* **10**, 1707–1723 (2004).
- 127 9. Chiti, T. *et al.* Predicting changes in soil organic carbon in mediterranean and alpine forests  
128 during the Kyoto Protocol commitment periods using the CENTURY model. *Soil Use Manag.* **26**,  
129 475–484 (2010).

- 130 10. Granier, A. et al. Evidence for soil water control on carbon and water dynamics in European  
131 forests during the extremely dry year: 2003. *Agric. For. Meteorol.* **143**, 123–145 (2007).
- 132 11. Richardson, A. D. et al. Influence of spring and autumn phenological transitions on forest  
133 ecosystem productivity. *Philos. Trans. R. Soc. Lond. B. Biol. Sci.* **365**, 3227–46 (2010).
- 134 12. Law, B. E., Baldocchi, D. D. & Anthoni, P. M. Below-canopy and soil CO<sub>2</sub> fluxes in a  
135 ponderosa pine forest. *Agric. For. Meteorol.* **94**, 171–188 (1999).
- 136 13. Monson, R. K. et al. Carbon sequestration in a high-elevation, subalpine forest. *Glob. Chang.*  
137 *Biol.* **8**, 459–478 (2002)
- 138 14. Bakwin, P. S., Tans, P. P., Hurst, D. F. & Zhao, C. Measurements of carbon dioxide on very  
139 tall towers: results of the NOAA/CMDL program. *Tellus B* **50**, 401–415 (1998).
- 140 15. Montagnani, L. et al. A new mass conservation approach to the study of CO<sub>2</sub> advection in an  
141 alpine forest. *J. Geophys. Res.* **114**, D07306 (2009).
- 142 16. Louis, J. et al. Remote sensing of sunlight-induced chlorophyll fluorescence and reflectance of  
143 Scots pine in the boreal forest during spring recovery. *Remote Sens. Environ.* **96**, 37–48 (2005).
- 144 17. Pilegaard, K., Ibrom, A., Courtney, M.S., Hummelshøj, P. and Jensen, N.O., 2011. Increasing  
145 net CO<sub>2</sub> uptake by a Danish beech forest during the period from 1996 to 2009. *Agricultural and*  
146 *Forest Meteorology*, 151: 934–946.
- 147 18. Grünwald, T. & Bernhofer, C. A decade of carbon, water and energy flux measurements of an  
148 old spruce forest at the Anchor Station Tharandt. *Tellus B* **59**, 387–396 (2007).
- 149 19. Rothstein, D. E., Zak, D. R., Pregitzer, K. S. & Curtis, P. S. Kinetics of nitrogen uptake by  
150 *Populus tremuloides* in relation to atmospheric CO<sub>2</sub> and soil nitrogen availability. *Tree Physiol.*  
151 **20**, 265–270 (2000).

152 20. Longdoz, B., Yernaux, M. & Aubinet, M. Soil CO<sub>2</sub> efflux measurements in a mixed forest:  
153 impact of chamber disturbances, spatial variability and seasonal evolution. *Glob. Chang. Biol.* **6**,  
154 907–917 (2000).

155
